# Supplementary material for: Age-related changes to triceps surae muscle-subtendon interaction dynamics during walking
Source: PubMed Central journal article supplement (PMC8553842; doi:10.1038/s41598-021-00451-y), 2021-10-28
Supplement: 41598_2021_451_MOESM1_ESM.pdf [file 41598_2021_451_MOESM1_ESM.pdf]

**Age-Related Changes to Triceps Surae Muscle-Subtendon Interaction Dynamics During Walking**

William H. Clark and Jason R. Franz\*

Joint Department of Biomedical Engineering, University of North Carolina at Chapel Hill and North Carolina State University, Chapel Hill, NC, USA

\*Author for correspondence

Jason R. Franz

Email: jrfranz@email.unc.edu

Phone: (919) 966-6119

Fax: (919) 966-2963

10206C Mary Ellen Jones Building

Chapel Hill, NC 27599

## SUPPLEMENTARY INFORMATION

### *Fascicle Operating Length*

As seen in Supplementary Figure S3, average GAS fascicle operating lengths decreased with increasing speed and horizontal forces (Speed:  $P = 0.034$ ,  $\eta_p^2 = 0.191$ ; Force:  $P < 0.001$ ,  $\eta_p^2 = 0.501$ ); SOL fascicle operating lengths only decreased in response to increases in horizontal force (Speed:  $P = 0.107$ ,  $\eta_p^2 = 0.142$ ; Force:  $P = 0.002$ ,  $\eta_p^2 = 0.315$ ). Older adults had significantly shorter average GAS fascicle operating lengths than young adults (Speed:  $P = 0.004$ ,  $\eta_p^2 = 0.409$ ; Force:  $P = 0.005$ ,  $\eta_p^2 = 0.398$ ). Moreover, significant interactions revealed older adult GAS fascicle operating lengths were less sensitive to changes in horizontal force than that of younger adults (age $\times$ horizontal force,  $P = 0.002$ ,  $\eta_p^2 = 0.327$ ). Conversely, we did not observe a significant main effect of age on average SOL fascicle operating length (Speed:  $P = 0.342$ ,  $\eta_p^2 = 0.057$ ; Force:  $P = 0.264$ ,  $\eta_p^2 = 0.077$ ).

### *Muscle Fascicle Velocity*

The magnitudes of peak GAS and SOL fascicle shortening velocity increased with increasing speed ( $P$ -values  $\leq 0.024$ ,  $\eta_p^2 \geq 0.209$ ) but were unaffected by horizontal forces ( $P$ -values  $\geq 0.123$ ,  $\eta_p^2 \leq 0.123$ ). We did not observe a significant main effect of age on the magnitudes of peak GAS or SOL fascicle shortening velocity during conditions that altered speed ( $P$ -values  $\geq 0.110$ ,  $\eta_p^2 \leq 0.152$ ). However, older adult GAS fascicle shortening velocity was significantly slower than young adults during conditions that altered horizontal force ( $P = 0.017$ ,  $\eta_p^2 = 0.306$ ); SOL fascicle shortening velocity was unaffected by age ( $P = 0.124$ ,  $\eta_p^2 = 0.141$ ). We have previously proposed that a shift to slower fascicle shortening velocities in older adults may serve to meet the muscle force-generating demands of walking in the presence of muscle weakness<sup>54</sup>.

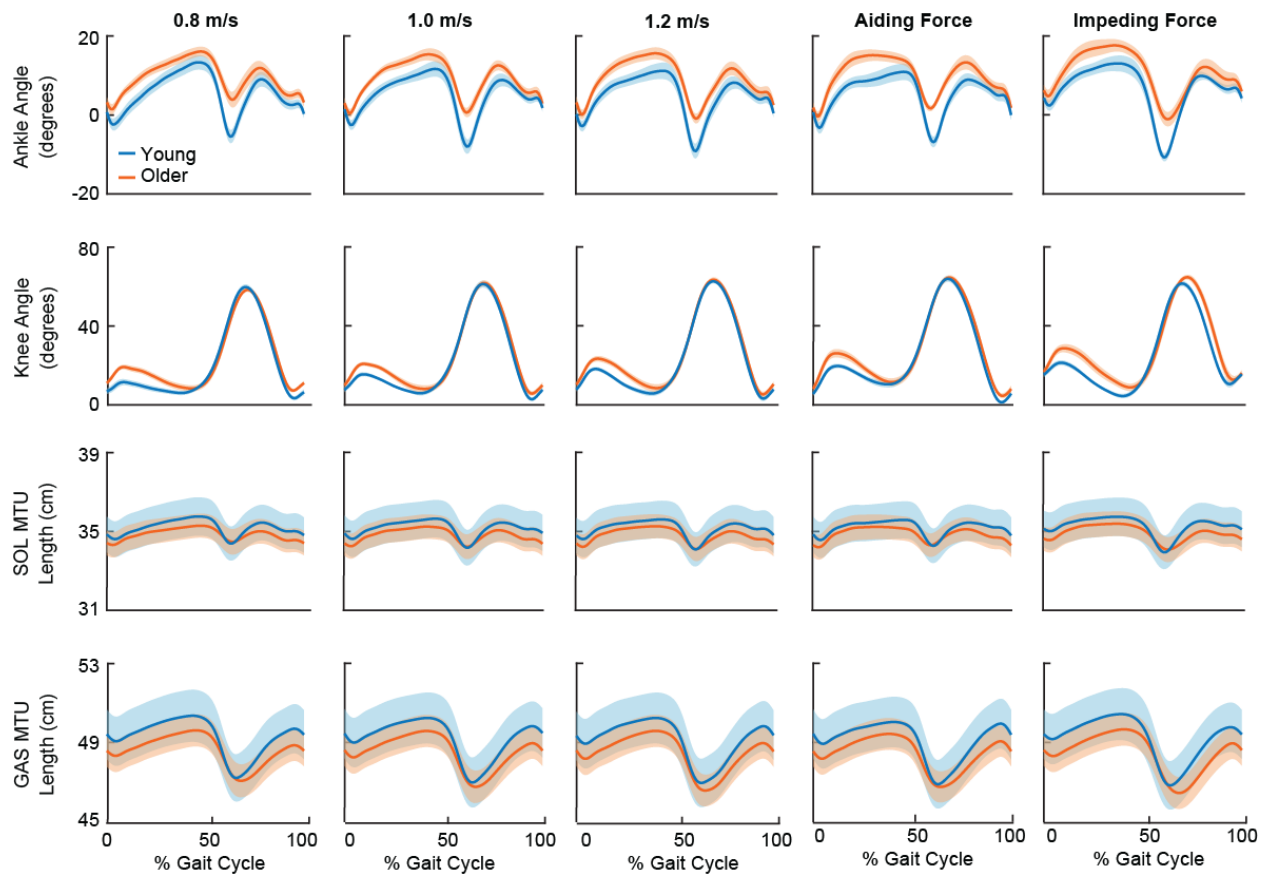

**Supplementary Figure S1.** Group average ankle angle, knee angle, soleus (SOL), and medial gastrocnemius (GAS) muscle-tendon unit (MTU) length for young (blue) and older (orange) adults during conditions that altered speed (left) and horizontal force (right).

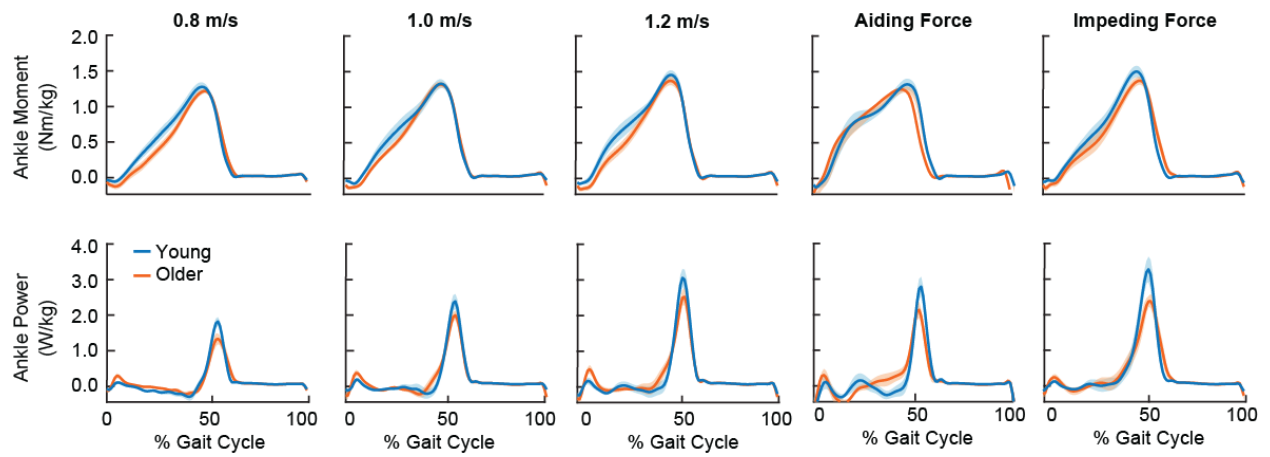

**Supplementary Figure S2.** Group average ankle moment and ankle power curves for young (blue) and older (orange) adults during conditions that alter speed (left) and horizontal force (right).

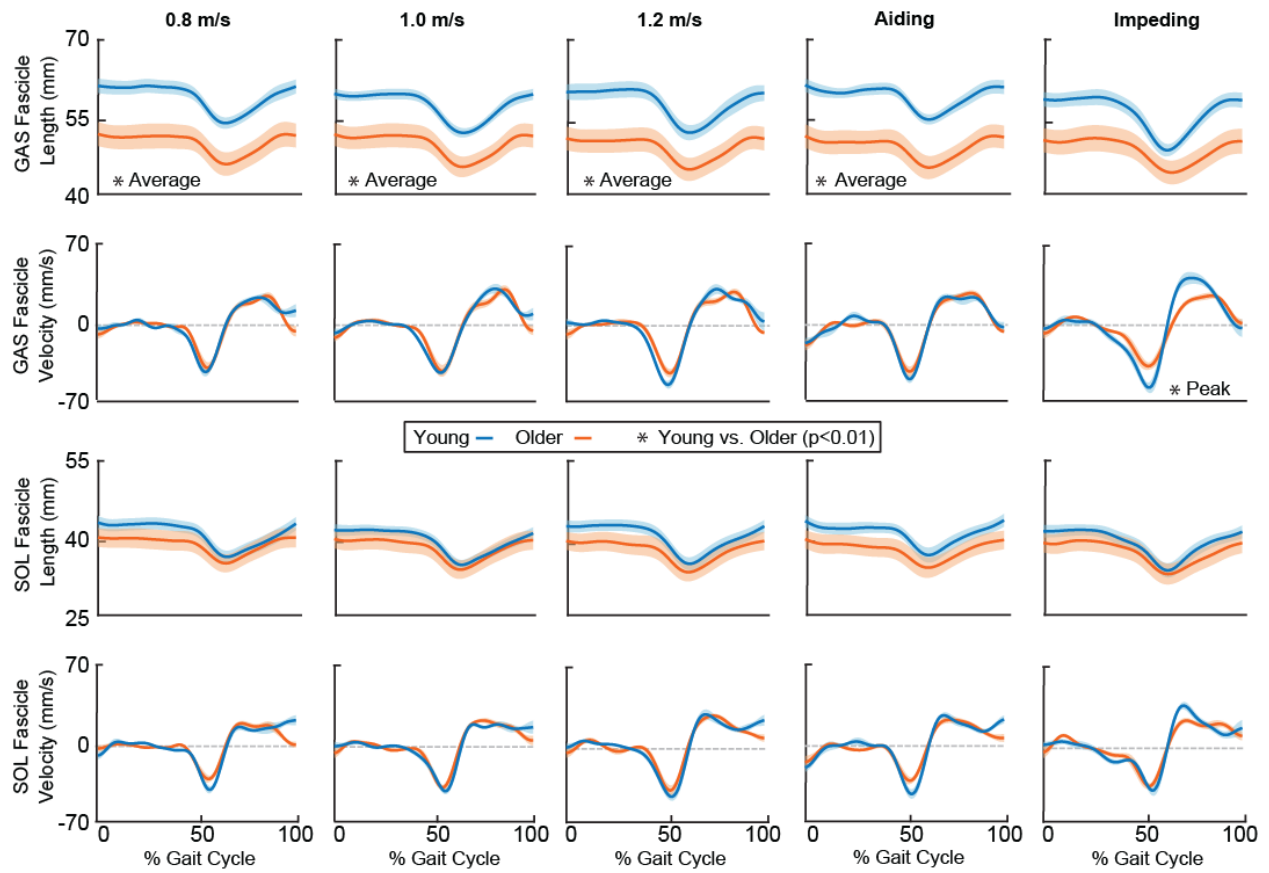

**Supplementary Figure S3.** Group average (standard error) fascicle length and velocity profiles for the medial gastrocnemius (GAS) and soleus (SOL) muscles. Single asterisks (\*) represent significant differences between young (blue) and older (orange) adults ( $P < 0.01$ ).

**Supplementary Table S1.** Summary statistics for pairwise comparisons across conditions

|                                           | 0.8 m/s                 |                         | 1.0 m/s                 |                         | 1.2 m/s (“Normal”)      |                         | 5 %BW Aiding            |                         | 5 %BW Impeding           |                         |
|-------------------------------------------|-------------------------|-------------------------|-------------------------|-------------------------|-------------------------|-------------------------|-------------------------|-------------------------|--------------------------|-------------------------|
|                                           | Young                   | Older                   | Young                   | Older                   | Young                   | Older                   | Young                   | Older                   | Young                    | Older                   |
| Plantarflexor Mechanical Output           |                         |                         |                         |                         |                         |                         |                         |                         |                          |                         |
| <i>Moment (Nm/kg)</i>                     | 1.26±0.19*              | 1.21±0.10*              | 1.33±0.15*              | 1.30±0.12               | 1.43±0.19               | 1.36±0.16               | 1.35±0.12               | 1.25±0.08               | 1.50±0.22                | 1.40±0.14               |
| <i>Power (W/kg)</i>                       | 1.82±0.38*              | 1.53±0.46*              | 2.65±0.66*              | 2.19±0.39*              | 3.38±0.75               | 2.74±0.65               | 2.93±0.78               | 2.37±0.57               | 3.61±0.89                | 2.75±0.67               |
| <i>*Work (J/kg)</i>                       | 0.21±0.06*              | 0.18±0.04*              | 0.28±0.07*              | 0.24±0.05*              | 0.33±0.06               | 0.28±0.05               | 0.28±0.06               | 0.24±0.04               | 0.43±0.09*               | 0.35±0.06*              |
| Peak Achilles Subtendon Displacement (mm) |                         |                         |                         |                         |                         |                         |                         |                         |                          |                         |
| <i>Superficial</i>                        | 3.04±1.18               | 4.20±0.98*              | 3.30±1.36               | 5.10±1.77               | <b>4.01±1.32</b>        | <b>6.90±1.10</b>        | <b>2.73±1.09</b>        | <b>4.78±1.13*</b>       | 5.12±1.91                | 7.09±2.91               |
| <i>Deep</i>                               | 5.22±1.36* <sup>^</sup> | 5.34±1.15* <sup>^</sup> | 6.09±1.21 <sup>^</sup>  | 6.67±1.49* <sup>^</sup> | 7.47±1.50 <sup>^</sup>  | 8.51±0.91 <sup>^</sup>  | 5.20±1.46* <sup>^</sup> | 6.28±1.03* <sup>^</sup> | 9.50±1.53* <sup>^</sup>  | 8.76±2.67 <sup>^</sup>  |
| <i>Difference</i>                         | <b>2.18±0.75*</b>       | <b>1.14±0.37*</b>       | <b>2.79±0.53</b>        | <b>1.57±0.48</b>        | <b>3.47±0.77</b>        | <b>1.61±0.43</b>        | 2.47±0.98               | 1.50±0.52               | <b>4.38±0.81</b>         | <b>1.67±0.82</b>        |
| Peak Muscle Length Change (mm)            |                         |                         |                         |                         |                         |                         |                         |                         |                          |                         |
| <i>MG</i>                                 | 6.06±1.69               | 4.90±1.79               | 6.48±1.24               | 5.67±1.91               | <b>8.23±1.15</b>        | <b>5.53±1.31</b>        | 4.82±0.67*              | 5.02±1.53               | <b>10.35±2.03*</b>       | <b>6.08±1.68</b>        |
| <i>SOL</i>                                | 5.32±1.43*              | 4.52±1.41*              | 5.89±0.93               | 5.93±1.46               | 7.17±1.11 <sup>^</sup>  | 6.15±1.17               | 4.66±1.30*              | 4.94±1.33               | 8.39±1.67 <sup>^</sup>   | 6.50±2.08               |
| <i>Difference</i>                         | 0.74±1.32               | 0.38±0.90               | 0.60±1.18               | 0.26±1.15               | <b>1.05±0.89</b>        | <b>0.62±0.57</b>        | 0.15±1.25               | 0.08±1.00               | <b>1.96±0.58*</b>        | <b>0.42±1.12</b>        |
| Average Fascicle Operating length (mm)    |                         |                         |                         |                         |                         |                         |                         |                         |                          |                         |
| <i>MG</i>                                 | <b>59.09±3.74</b>       | <b>49.98±7.05</b>       | <b>57.41±2.95</b>       | <b>49.71±6.52</b>       | <b>57.91±4.68</b>       | <b>49.08±6.92</b>       | <b>59.16±3.33</b>       | <b>49.19±6.82</b>       | 55.99±4.15*              | 48.63±7.28              |
| <i>SOL</i>                                | 40.91±3.57 <sup>^</sup> | 38.77±5.64 <sup>^</sup> | 39.51±2.91 <sup>^</sup> | 38.06±5.75 <sup>^</sup> | 40.29±3.54 <sup>^</sup> | 37.65±5.60 <sup>^</sup> | 40.99±3.57 <sup>^</sup> | 37.74±5.68 <sup>^</sup> | 39.21±3.61 <sup>^</sup>  | 37.29±6.11 <sup>^</sup> |
| Fascicle Shortening Velocity (mm/s)       |                         |                         |                         |                         |                         |                         |                         |                         |                          |                         |
| <i>MG</i>                                 | 46.42±10.98             | 44.40±14.74             | 46.76±5.63              | 46.63±17.36             | 58.14±10.49             | 48.09±8.99              | 51.14±10.25             | 48.32±10.26             | <b>64.07±14.89</b>       | <b>45.62±11.88</b>      |
| <i>SOL</i>                                | 44.25±7.70*             | 36.44±9.96              | 46.50±8.09              | 42.86±7.48              | 52.73±10.37             | 45.25±12.20             | 47.57±12.16             | 38.00±6.57 <sup>^</sup> | 45.39±14.28 <sup>^</sup> | 42.69±11.79             |

Summary statistics shown are mean±SD, significant age group differences are shown in **bold** (p<0.01), \*indicates a within-group speed/force difference compared to walking at 1.2 m/s (p<0.01), <sup>^</sup>indicates a within group MG/SOL or superficial/deep difference (p<0.01).

**Supplementary Table S2.** P-values and effect sizes (Hedges *g*) for Young vs Older adults across conditions

|                                           | 0.8 m/s             |                    | 1.0 m/s             |                    | 1.2 m/s (“Normal”)  |                     | 5 %BW Aiding        |                    | 5 %BW Impeding      |                    |
|-------------------------------------------|---------------------|--------------------|---------------------|--------------------|---------------------|---------------------|---------------------|--------------------|---------------------|--------------------|
|                                           | p-value (g)         | g 95% CI           | p-value (g)         | g 95% CI           | p-value (g)         | g 95% CI            | p-value (g)         | g 95% CI           | p-value (g)         | g 95% CI           |
| Plantarflexor Mechanical Output           |                     |                    |                     |                    |                     |                     |                     |                    |                     |                    |
| <i>Moment (Nm/kg)</i>                     | 0.41 (0.377)        | [-0.54,1.33]       | 0.71 (0.173)        | [-0.74,1.11]       | 0.40 (0.392)        | [-0.52,1.35]        | 0.07 (0.889)        | [-0.04,1.91]       | 0.27 (0.513)        | [-0.40,1.48]       |
| <i>Power (W/kg)</i>                       | 0.17 (0.643)        | [-0.27,1.63]       | 0.09 (0.812)        | [-0.11,1.82]       | 0.07 (0.879)        | [-0.05,1.90]        | 0.10 (0.776)        | [-0.15,1.78]       | 0.03 (1.036)        | [0.10,2.08]        |
| <i>*Work (J/kg)</i>                       | 0.17 (0.639)        | [-0.28,1.62]       | 0.18 (0.627)        | [-0.29,1.61]       | 0.09 (0.817)        | [-0.11,1.82]        | 0.19 (0.612)        | [-0.31,1.59]       | 0.08 (0.848)        | [-0.08,1.86]       |
| Peak Achilles Subtendon Displacement (mm) |                     |                    |                     |                    |                     |                     |                     |                    |                     |                    |
| <i>Superficial</i>                        | 0.04 (1.020)        | [0.08,2.06]        | 0.03 (1.086)        | [0.14,2.14]        | <b>0.00 (2.276)</b> | <b>[1.18,3.60]</b>  | <b>0.00 (1.762)</b> | <b>[0.75,2.95]</b> | 0.11 (0.763)        | [0.16,1.76]        |
| <i>Deep</i>                               | 0.84 (0.090)        | [0.83,1.02]        | 0.38 (0.406)        | [0.51,1.36]        | 0.10 (0.797)        | [0.13,1.80]         | 0.09 (0.818)        | [0.11,1.82]        | 0.48 (0.324)        | [1.27,0.59]        |
| <i>Difference</i>                         | <b>0.00 (1.667)</b> | <b>[0.66,2.84]</b> | <b>0.00 (2.309)</b> | <b>[1.21,3.64]</b> | <b>0.00 (2.854)</b> | <b>[1.65,4.34]</b>  | 0.02 (1.183)        | [0.23,2.25]        | <b>0.00 (3.173)</b> | <b>[1.90,4.76]</b> |
| Peak Muscle Length Change (mm)            |                     |                    |                     |                    |                     |                     |                     |                    |                     |                    |
| <i>MG</i>                                 | 0.18 (0.636)        | [-0.28,1.62]       | 0.30 (0.480)        | [-0.43,1.44]       | <b>0.00 (2.088)</b> | <b>[1.02,3.36]</b>  | 0.72 (-0.165)       | [-1.10,0.75]       | <b>0.00 (2.183)</b> | <b>[1.10,3.48]</b> |
| <i>SOL</i>                                | 0.25 (0.535)        | [-0.38,1.50]       | 0.94 (-0.033)       | [-0.96,0.89]       | 0.08 (0.854)        | [-0.07,1.87]        | 0.66 (-0.199)       | [-1.14,0.72]       | 0.05 (0.954)        | [0.02,1.98]        |
| <i>Difference</i>                         | 0.50 (0.308)        | [-0.61,1.25]       | 0.14 (0.280)        | [-0.63,1.22]       | <b>0.00 (0.558)</b> | <b>[-0.36,1.53]</b> | 0.90 (0.059)        | [-0.86,0.99]       | <b>0.00 (1.639)</b> | <b>[0.64,2.80]</b> |
| Average Fascicle Operating length (mm)    |                     |                    |                     |                    |                     |                     |                     |                    |                     |                    |
| <i>MG</i>                                 | <b>0.00 (1.537)</b> | <b>[0.55,2.68]</b> | <b>0.01 (1.449)</b> | <b>[0.47,2.57]</b> | <b>0.01 (1.423)</b> | <b>[0.45,2.54]</b>  | <b>0.00 (1.770)</b> | <b>[0.75,2.96]</b> | 0.02 (1.182)        | [0.23,2.25]        |
| <i>SOL</i>                                | 0.35 (0.431)        | [-0.48,1.39]       | 0.51 (0.304)        | [-0.61,1.25]       | 0.25 (0.538)        | [-0.38,1.51]        | 0.17 (0.651)        | [-0.27,1.63]       | 0.43 (0.363)        | [-0.55,1.31]       |
| Fascicle Shortening Velocity (mm/s)       |                     |                    |                     |                    |                     |                     |                     |                    |                     |                    |
| <i>MG</i>                                 | 0.75 (0.148)        | [-0.77,1.08]       | 0.98 (0.009)        | [-0.91,0.93]       | 0.04 (0.980)        | [0.05,2.01]         | 0.57 (0.261)        | [-0.65,1.20]       | <b>0.01 (1.305)</b> | <b>[0.34,2.40]</b> |
| <i>SOL</i>                                | 0.08 (0.836)        | [-0.09,1.85]       | 0.34 (0.445)        | [-0.47,1.40]       | 0.18 (0.629)        | [-0.29,1.61]        | 0.05 (0.932)        | [0.00,1.96]        | 0.67 (0.196)        | [-0.72,1.13]       |

Significant age group differences are shown in **bold** (p<0.01).

## **SUPPLEMENTARY VIDEO CAPTIONS**

**Supplementary Video V1.** Example ultrasound video of the triceps surae muscles during walking (recorded at 76 frames per second, shown at 20% playback speed). An open-source MATLAB routine, UltraTrack<sup>61</sup>, quantified time series of medial gastrocnemius and soleus fascicle lengths and pennation angles. Representative fascicles from superficial to deep aponeurosis are shown in yellow.

**Supplementary Video V2.** Example ultrasound video of the Achilles tendon during walking (recorded at 155 frames per second, shown at 20% playback speed). A 2-D speckle tracking algorithm quantified localized Achilles subtendon tissue displacements from toe off to subsequent toe off<sup>62</sup>. Green dots represent tracked grid of nodes encompassing only Achilles tendon tissue.
