# Supplementary material for: Age-related changes to triceps surae muscle-subtendon interaction dynamics during walking
Source: PubMed Central journal article supplement (PMC8553842; doi:10.1038/s41598-021-00451-y), 2021-10-28
Supplement: 41598_2021_451_MOESM2_ESM.pdf [file 41598_2021_451_MOESM2_ESM.pdf]

**Supplementary Table S3. Subject Anthropometrics**

| <b>Subject</b> | <b>Preferred<br/>Walking Speed<br/>(m/s)</b> | <b>Height (cm)</b> | <b>Gender</b> | <b>Mass (kg)</b> | <b>Age<br/>(years)</b> |
|----------------|----------------------------------------------|--------------------|---------------|------------------|------------------------|
| Young01        | 1.20                                         | 181                | M             | 75.4             | 22                     |
| Young02        | 1.24                                         | 177                | M             | 68.8             | 21                     |
| Young03        | 1.35                                         | 167                | F             | 67.4             | 24                     |
| Young04        | 1.34                                         | 194                | M             | 81.3             | 20                     |
| Young05        | 1.38                                         | 168                | F             | 69.4             | 23                     |
| Young06        | 1.07                                         | 178                | F             | 86.6             | 20                     |
| Young07        | 1.42                                         | 183                | M             | 99.8             | 27                     |
| Young08        | 1.21                                         | 175                | M             | 75.0             | 30                     |
| Young09        | 1.36                                         | 168                | F             | 65.2             | 30                     |
| Older01        | 1.14                                         | 173                | M             | 59.5             | 77                     |
| Older02        | 1.44                                         | 168                | M             | 69.6             | 75                     |
| Older03        | 1.27                                         | 163                | F             | 61.3             | 69                     |
| Older04        | 0.98                                         | 175                | M             | 79.4             | 71                     |
| Older05        | 1.05                                         | 170                | F             | 60.5             | 77                     |
| Older06        | 1.00                                         | 165                | M             | 69.8             | 78                     |
| Older07        | 1.53                                         | 165                | M             | 63.7             | 67                     |
| Older08        | 1.04                                         | 164                | F             | 69.2             | 77                     |
| Older09        | 1.18                                         | 183                | M             | 68.3             | 75                     |

**Supplementary Table S4.****Superficial (GAS) Subtendon Displacement During Stance (mm)**

| Subject | W08  | W10  | W12  | A12  | I12   |
|---------|------|------|------|------|-------|
| Young01 | -3.3 | -4.0 | -4.3 | -4.3 | -8.1  |
| Young02 | -2.3 | -3.5 | -4.4 | -2.6 | -5.5  |
| Young03 | -1.6 | -1.9 | -3.8 | -0.8 | -2.4  |
| Young04 | -2.1 | -3.0 | -6.7 | -2.8 | -7.6  |
| Young05 | -3.3 | -3.9 | -3.8 | -3.1 | -5.0  |
| Young06 | -2.1 | -2.1 | -2.4 | -1.9 | -2.6  |
| Young07 | -3.7 | -2.1 | -2.7 | -2.4 | -5.0  |
| Young08 | -3.6 | -2.9 | -3.0 | -2.5 | -4.8  |
| Young09 | -5.5 | -6.3 | -5.0 | -4.2 | -5.1  |
| Older01 | -3.8 | -6.6 | -7.3 | -5.5 | -7.2  |
| Older02 | -4.5 | -4.5 | -5.7 | -3.6 | -9.4  |
| Older03 | -5.3 | -2.6 | -7.8 | -5.2 | -2.6  |
| Older04 | -4.1 | -3.4 | -6.1 | -4.1 | -7.8  |
| Older05 | -5.0 | -5.9 | -7.3 | -6.4 | -9.8  |
| Older06 | -2.4 | -3.5 | -7.0 | -5.7 | -3.9  |
| Older07 | -4.7 | -8.2 | -9.0 | -5.1 | -11.7 |
| Older08 | -4.9 | -5.7 | -5.6 | -4.7 | -5.2  |
| Older09 | -2.9 | -5.5 | -6.4 | -2.8 | -6.2  |

**Supplementary Table S5.****Deep (SOL) Subtendon Displacement During Stance (mm)**

| Subject | W08  | W10  | W12   | A12  | I12   |
|---------|------|------|-------|------|-------|
| Young01 | -5.0 | -7.0 | -8.7  | -6.7 | -11.8 |
| Young02 | -3.2 | -5.5 | -7.9  | -4.1 | -10.1 |
| Young03 | -4.3 | -4.7 | -6.4  | -4.2 | -7.3  |
| Young04 | -4.9 | -5.5 | -10.2 | -5.6 | -10.5 |
| Young05 | -4.6 | -6.4 | -6.1  | -4.6 | -9.6  |
| Young06 | -4.7 | -4.9 | -5.8  | -4.1 | -7.1  |
| Young07 | -6.0 | -5.7 | -6.0  | -3.5 | -9.9  |
| Young08 | -6.8 | -6.5 | -7.8  | -6.2 | -10.4 |
| Young09 | -7.6 | -8.7 | -8.4  | -7.8 | -8.8  |
| Older01 | -4.4 | -8.0 | -8.9  | -7.0 | -8.4  |
| Older02 | -6.0 | -5.8 | -7.9  | -4.8 | -10.6 |
| Older03 | -6.7 | -5.0 | -8.9  | -6.2 | -5.5  |
| Older04 | -5.4 | -5.1 | -7.8  | -5.9 | -9.3  |
| Older05 | -6.7 | -8.0 | -9.4  | -7.9 | -11.1 |
| Older06 | -3.5 | -5.1 | -8.9  | -7.5 | -4.7  |
| Older07 | -5.4 | -9.0 | -9.9  | -6.1 | -12.9 |
| Older08 | -5.9 | -7.0 | -7.0  | -5.8 | -6.9  |
| Older09 | -4.0 | -7.0 | -7.9  | -5.4 | -9.4  |

**Supplementary Table S6.****Achilles Tendon Non-Uniformity During Stance (mm)**

| <b>Subject</b> | <b>W08</b> | <b>W10</b> | <b>W12</b> | <b>A12</b> | <b>I12</b> |
|----------------|------------|------------|------------|------------|------------|
| Young01        | 1.7        | 3.0        | 4.4        | 2.5        | 3.7        |
| Young02        | 0.8        | 2.0        | 3.5        | 1.4        | 4.6        |
| Young03        | 2.7        | 2.9        | 2.6        | 3.4        | 4.9        |
| Young04        | 2.8        | 2.5        | 3.5        | 2.8        | 2.9        |
| Young05        | 1.4        | 2.4        | 2.3        | 1.5        | 4.6        |
| Young06        | 2.6        | 2.7        | 3.4        | 2.2        | 4.5        |
| Young07        | 2.3        | 3.5        | 3.3        | 1.1        | 4.9        |
| Young08        | 3.2        | 3.6        | 4.8        | 3.6        | 5.6        |
| Young09        | 2.2        | 2.4        | 3.4        | 3.6        | 3.7        |
| Older01        | 0.6        | 1.4        | 1.6        | 1.5        | 1.2        |
| Older02        | 1.5        | 1.3        | 2.2        | 1.2        | 1.2        |
| Older03        | 1.4        | 2.4        | 1.0        | 1.0        | 2.9        |
| Older04        | 1.3        | 1.7        | 1.7        | 1.8        | 1.6        |
| Older05        | 1.7        | 2.2        | 2.1        | 1.5        | 1.3        |
| Older06        | 1.0        | 1.6        | 1.9        | 1.9        | 0.7        |
| Older07        | 0.7        | 0.8        | 1.0        | 1.0        | 1.2        |
| Older08        | 1.0        | 1.3        | 1.4        | 1.1        | 1.7        |
| Older09        | 1.0        | 1.5        | 1.6        | 2.6        | 3.2        |

**Supplementary Table S7.****GAS Muscle Length Change During Stance (mm)**

| Subject | W08 | W10 | W12  | A12 | I12  |
|---------|-----|-----|------|-----|------|
| Young01 | 4.3 | 6.2 | 8.8  | 3.5 | 12.4 |
| Young02 | 9.3 | 6.2 | 8.7  | 4.6 | 13.3 |
| Young03 | 6.0 | 5.5 | 6.5  | 4.8 | 7.6  |
| Young04 | 8.5 | 8.4 | 7.5  | 4.5 | 8.2  |
| Young05 | 4.7 | 6.9 | 9.1  | 5.0 | 9.6  |
| Young06 | 5.3 | 6.8 | 6.9  | 4.8 | 9.9  |
| Young07 | 5.5 | 4.0 | 10.1 | 4.9 | 12.8 |
| Young08 | 5.5 | 7.1 | 7.7  | 6.1 | 9.9  |
| Young09 | 5.5 | 7.3 | 8.7  | 5.0 | 9.4  |
| Older01 | 2.6 | 4.1 | 4.3  | 5.0 | 5.8  |
| Older02 | 7.0 | 7.2 | 6.4  | 3.6 | 6.8  |
| Older03 | 6.6 | 3.5 | 4.3  | 6.0 | 4.4  |
| Older04 | 5.8 | 7.6 | 7.3  | 7.5 | 6.9  |
| Older05 | 6.8 | 8.9 | 6.9  | 7.1 | 9.7  |
| Older06 | 2.7 | 4.0 | 5.7  | 4.6 | 3.9  |
| Older07 | 3.2 | 4.6 | 4.3  | 3.4 | 6.0  |
| Older08 | 5.3 | 4.8 | 4.0  | 3.4 | 5.3  |
| Older09 | 4.0 | 6.5 | 6.5  | 4.6 | 5.8  |

**Supplementary Table S8.****SOL Muscle Length Change During Stance (mm)**

| Subject | W08 | W10 | W12 | A12 | I12  |
|---------|-----|-----|-----|-----|------|
| Young01 | 4.1 | 6.1 | 6.5 | 4.7 | 10.1 |
| Young02 | 7.5 | 6.1 | 6.8 | 6.1 | 10.7 |
| Young03 | 6.0 | 4.8 | 6.3 | 5.2 | 6.7  |
| Young04 | 5.5 | 6.8 | 6.1 | 2.6 | 6.6  |
| Young05 | 3.3 | 4.9 | 7.2 | 4.5 | 7.5  |
| Young06 | 4.0 | 4.8 | 7.2 | 5.2 | 8.2  |
| Young07 | 7.0 | 5.6 | 9.8 | 4.3 | 10.5 |
| Young08 | 5.8 | 7.3 | 7.0 | 6.5 | 8.3  |
| Young09 | 4.5 | 6.5 | 7.7 | 2.9 | 6.8  |
| Older01 | 3.4 | 6.0 | 5.9 | 5.3 | 5.2  |
| Older02 | 5.9 | 6.2 | 6.8 | 3.3 | 6.0  |
| Older03 | 4.7 | 5.1 | 5.8 | 4.8 | 4.9  |
| Older04 | 6.3 | 8.7 | 8.0 | 8.0 | 7.8  |
| Older05 | 6.1 | 7.4 | 7.3 | 5.0 | 10.7 |
| Older06 | 3.1 | 4.2 | 5.9 | 4.7 | 4.2  |
| Older07 | 2.3 | 5.2 | 4.7 | 4.7 | 7.6  |
| Older08 | 4.5 | 4.2 | 4.4 | 3.6 | 7.4  |
| Older09 | 4.4 | 6.3 | 6.5 | 5.0 | 4.6  |

**Supplementary Table S9.****GAS - SOL Muscle Length Change During Stance (mm)**

| <b>Subject</b> | <b>W08</b> | <b>W10</b> | <b>W12</b> | <b>A12</b> | <b>I12</b> |
|----------------|------------|------------|------------|------------|------------|
| Young01        | 0.1        | 0.1        | 2.3        | -1.2       | 2.3        |
| Young02        | 1.8        | 0.1        | 2.0        | -1.5       | 2.6        |
| Young03        | -0.1       | 0.7        | 0.3        | -0.4       | 0.8        |
| Young04        | 2.9        | 1.5        | 1.4        | 1.9        | 1.6        |
| Young05        | 1.4        | 2.0        | 1.9        | 0.6        | 2.1        |
| Young06        | 1.3        | 2.0        | -0.3       | -0.4       | 1.7        |
| Young07        | -1.6       | -1.6       | 0.3        | 0.7        | 2.3        |
| Young08        | -0.2       | -0.2       | 0.7        | -0.4       | 1.5        |
| Young09        | 1.0        | 0.8        | 0.9        | 2.1        | 2.6        |
| Older01        | -0.8       | -1.9       | -1.6       | -0.4       | 0.6        |
| Older02        | 1.0        | 1.0        | -0.4       | 0.3        | 0.8        |
| Older03        | 1.9        | -1.6       | -1.5       | 1.2        | -0.5       |
| Older04        | -0.5       | -1.1       | -0.7       | -0.5       | -0.9       |
| Older05        | 0.7        | 1.5        | -0.5       | 2.1        | -1.0       |
| Older06        | -0.4       | -0.3       | -0.2       | -0.1       | -0.3       |
| Older07        | 0.8        | -0.7       | -0.4       | -1.3       | -1.6       |
| Older08        | 0.8        | 0.5        | -0.4       | -0.2       | -2.1       |
| Older09        | -0.3       | 0.2        | 0.0        | -0.4       | 1.2        |

**Supplementary Table S10.****Peak Ankle Moment (Nm/kg)**

| Subject | W08  | W10  | W12  | A12  | I12  |
|---------|------|------|------|------|------|
| Young01 | 1.33 | 1.35 | 1.37 | 1.29 | 1.43 |
| Young02 | 1.09 | 1.27 | 1.37 | 1.36 | 1.47 |
| Young03 | 1.19 | 1.36 | 1.48 | 1.27 | 1.48 |
| Young04 | 1.64 | 1.53 | 1.66 | 1.54 | 1.92 |
| Young05 | 1.42 | 1.42 | 1.63 | 1.45 | 1.63 |
| Young06 | 1.23 | 1.35 | 1.42 | 1.32 | 1.48 |
| Young07 | 1.10 | 1.16 | 1.31 | 1.17 | 1.35 |
| Young08 | 1.06 | 1.05 | 1.05 | 1.23 | 1.10 |
| Young09 | 1.33 | 1.49 | 1.60 | 1.48 | 1.63 |
| Older01 | 1.24 | 1.41 | 1.55 | 1.25 | 1.37 |
| Older02 | 1.32 | 1.37 | 1.46 | 1.34 | 1.56 |
| Older03 | 1.24 | 1.35 | 1.42 | 1.31 | 1.42 |
| Older04 | 1.25 | 1.26 | 1.25 | 1.21 | 1.29 |
| Older05 | 1.32 | 1.48 | 1.55 | 1.30 | 1.64 |
| Older06 | 1.11 | 1.17 | 1.11 | 1.09 | 1.25 |
| Older07 | 1.21 | 1.39 | 1.47 | 1.34 | 1.50 |
| Older08 | 1.08 | 1.14 | 1.22 | 1.19 | 1.28 |
| Older09 | 1.07 | 1.17 | 1.21 | 1.20 | 1.27 |

**Supplementary Table S11.****Peak Ankle Power (W/kg)**

| Subject | W08  | W10  | W12  | A12  | I12  |
|---------|------|------|------|------|------|
| Young01 | 1.76 | 2.60 | 3.22 | 3.11 | 3.06 |
| Young02 | 1.61 | 2.62 | 3.10 | 3.53 | 4.08 |
| Young03 | 2.09 | 2.52 | 3.64 | 2.68 | 3.20 |
| Young04 | 2.06 | 2.76 | 3.64 | 3.09 | 4.82 |
| Young05 | 1.88 | 3.10 | 3.84 | 3.14 | 4.10 |
| Young06 | 1.06 | 1.44 | 2.24 | 1.91 | 2.49 |
| Young07 | 2.13 | 3.64 | 4.27 | 3.15 | 3.98 |
| Young08 | 1.52 | 1.95 | 2.28 | 1.61 | 2.28 |
| Young09 | 2.26 | 3.23 | 4.21 | 4.17 | 4.47 |
| Older01 | 0.66 | 1.99 | 2.44 | 1.89 | 1.98 |
| Older02 | 1.97 | 2.56 | 3.27 | 2.54 | 3.16 |
| Older03 | 1.90 | 2.45 | 3.37 | 2.98 | 2.82 |
| Older04 | 1.73 | 2.04 | 2.94 | 3.09 | 3.26 |
| Older05 | 2.02 | 2.50 | 3.38 | 1.90 | 4.00 |
| Older06 | 1.28 | 2.24 | 1.93 | 2.49 | 2.17 |
| Older07 | 1.50 | 2.22 | 2.79 | 2.73 | 2.57 |
| Older08 | 1.69 | 2.37 | 2.98 | 2.43 | 2.85 |
| Older09 | 1.05 | 1.30 | 1.55 | 1.32 | 1.95 |

**Supplementary Table S12.****Positive Ankle Push-Off Work (J/kg)**

| <b>Subject</b> | <b>W08</b> | <b>W10</b> | <b>W12</b> | <b>A12</b> | <b>I12</b> |
|----------------|------------|------------|------------|------------|------------|
| Young01        | 0.20       | 0.36       | 0.41       | 0.34       | 0.53       |
| Young02        | 0.16       | 0.23       | 0.30       | 0.32       | 0.42       |
| Young03        | 0.17       | 0.26       | 0.35       | 0.24       | 0.35       |
| Young04        | 0.30       | 0.30       | 0.36       | 0.34       | 0.58       |
| Young05        | 0.22       | 0.29       | 0.33       | 0.26       | 0.45       |
| Young06        | 0.16       | 0.18       | 0.25       | 0.15       | 0.31       |
| Young07        | 0.26       | 0.35       | 0.38       | 0.26       | 0.39       |
| Young08        | 0.14       | 0.18       | 0.24       | 0.25       | 0.31       |
| Young09        | 0.26       | 0.35       | 0.37       | 0.34       | 0.49       |
| Older01        | 0.12       | 0.26       | 0.27       | 0.32       | 0.33       |
| Older02        | 0.22       | 0.23       | 0.33       | 0.22       | 0.35       |
| Older03        | 0.20       | 0.27       | 0.28       | 0.26       | 0.42       |
| Older04        | 0.16       | 0.16       | 0.21       | 0.21       | 0.26       |
| Older05        | 0.18       | 0.31       | 0.38       | 0.21       | 0.43       |
| Older06        | 0.10       | 0.20       | 0.25       | 0.30       | 0.40       |
| Older07        | 0.23       | 0.31       | 0.32       | 0.25       | 0.41       |
| Older08        | 0.19       | 0.21       | 0.27       | 0.24       | 0.27       |
| Older09        | 0.19       | 0.19       | 0.24       | 0.19       | 0.33       |

**Supplementary Table S13.****GAS Average Operating Length (mm)**

| <b>Subject</b> | <b>W08</b> | <b>W10</b> | <b>W12</b> | <b>A12</b> | <b>I12</b> |
|----------------|------------|------------|------------|------------|------------|
| Young01        | 61.2       | 59.5       | 55.8       | 57.0       | 54.8       |
| Young02        | 65.8       | 61.3       | 65.0       | 64.1       | 64.5       |
| Young03        | 57.8       | 57.8       | 58.9       | 59.9       | 56.5       |
| Young04        | 59.6       | 58.1       | 59.6       | 61.3       | 56.1       |
| Young05        | 62.3       | 59.3       | 63.9       | 62.6       | 59.5       |
| Young06        | 57.8       | 56.4       | 57.6       | 59.5       | 56.2       |
| Young07        | 57.9       | 56.9       | 54.7       | 58.7       | 52.9       |
| Young08        | 52.5       | 50.7       | 49.9       | 53.6       | 50.1       |
| Young09        | 57.0       | 56.8       | 55.6       | 55.7       | 53.4       |
| Older01        | 48.7       | 48.3       | 46.0       | 46.9       | 45.3       |
| Older02        | 47.5       | 47.0       | 46.3       | 47.6       | 45.5       |
| Older03        | 45.4       | 48.5       | 47.5       | 46.7       | 47.3       |
| Older04        | 44.8       | 44.0       | 43.4       | 44.0       | 44.0       |
| Older05        | 59.8       | 58.1       | 57.8       | 57.6       | 58.1       |
| Older06        | 40.9       | 41.1       | 40.1       | 40.4       | 38.6       |
| Older07        | 46.0       | 45.0       | 45.0       | 43.7       | 43.8       |
| Older08        | 56.5       | 57.3       | 55.7       | 57.2       | 55.3       |
| Older09        | 60.2       | 58.2       | 59.8       | 58.6       | 59.7       |

**Supplementary Table S14.****SOL Average Operating Length (mm)**

| <b>Subject</b> | <b>W08</b> | <b>W10</b> | <b>W12</b> | <b>A12</b> | <b>I12</b> |
|----------------|------------|------------|------------|------------|------------|
| Young01        | 45.4       | 42.4       | 42.5       | 44.5       | 41.7       |
| Young02        | 42.2       | 39.1       | 35.6       | 34.4       | 34.9       |
| Young03        | 40.3       | 40.9       | 41.0       | 41.8       | 40.7       |
| Young04        | 44.1       | 42.0       | 45.9       | 45.5       | 43.6       |
| Young05        | 43.0       | 41.8       | 41.3       | 42.6       | 38.3       |
| Young06        | 36.0       | 34.7       | 41.0       | 40.4       | 40.2       |
| Young07        | 38.5       | 38.7       | 40.4       | 41.6       | 38.4       |
| Young08        | 35.5       | 35.1       | 34.0       | 36.4       | 32.6       |
| Young09        | 43.2       | 40.9       | 40.9       | 41.7       | 42.6       |
| Older01        | 44.7       | 43.2       | 42.5       | 41.9       | 43.9       |
| Older02        | 40.2       | 40.0       | 38.1       | 39.1       | 37.7       |
| Older03        | 38.3       | 38.4       | 38.0       | 38.6       | 38.2       |
| Older04        | 29.0       | 28.7       | 29.3       | 28.9       | 28.6       |
| Older05        | 43.1       | 41.3       | 42.0       | 41.9       | 41.0       |
| Older06        | 31.9       | 31.2       | 30.4       | 31.0       | 30.0       |
| Older07        | 36.2       | 33.1       | 32.9       | 32.1       | 31.2       |
| Older08        | 39.8       | 41.4       | 40.7       | 41.2       | 39.6       |
| Older09        | 45.7       | 45.4       | 44.9       | 45.0       | 45.6       |



**Supplementary Table S15.****GAS Peak Shortening Velocity (mm/s)**

| <b>Subject</b> | <b>W08</b> | <b>W10</b> | <b>W12</b> | <b>A12</b> | <b>I12</b> |
|----------------|------------|------------|------------|------------|------------|
| Young01        | -36.2      | -47.7      | -62.0      | -30.9      | -57.1      |
| Young02        | -60.5      | -48.6      | -51.5      | -57.7      | -88.0      |
| Young03        | -48.6      | -42.0      | -48.7      | -39.3      | -38.9      |
| Young04        | -56.3      | -57.7      | -55.9      | -61.0      | -56.1      |
| Young05        | -30.7      | -42.5      | -45.2      | -55.9      | -84.0      |
| Young06        | -33.6      | -38.5      | -57.2      | -49.1      | -64.3      |
| Young07        | -58.2      | -46.0      | -78.0      | -50.7      | -67.9      |
| Young08        | -44.6      | -51.3      | -54.4      | -62.2      | -57.5      |
| Young09        | -49.1      | -46.5      | -70.4      | -53.4      | -62.8      |
| Older01        | -29.2      | -26.3      | -49.1      | -44.8      | -46.4      |
| Older02        | -56.3      | -48.6      | -48.7      | -33.3      | -51.6      |
| Older03        | -61.8      | -36.6      | -45.4      | -54.8      | -33.7      |
| Older04        | -54.7      | -75.2      | -61.1      | -62.5      | -58.9      |
| Older05        | -61.9      | -73.0      | -62.9      | -61.1      | -66.5      |
| Older06        | -29.8      | -34.5      | -45.0      | -34.9      | -31.6      |
| Older07        | -31.6      | -33.2      | -34.6      | -44.6      | -35.1      |
| Older08        | -46.2      | -40.9      | -41.0      | -48.4      | -46.6      |
| Older09        | -28.1      | -51.2      | -45.2      | -50.6      | -40.1      |

**Supplementary Table S16.****SOL Peak Shortening Velocity (mm/s)**

| <b>Subject</b> | <b>W08</b> | <b>W10</b> | <b>W12</b> | <b>A12</b> | <b>I12</b> |
|----------------|------------|------------|------------|------------|------------|
| Young01        | -44.4      | -47.7      | -44.5      | -32.7      | -30.1      |
| Young02        | -51.4      | -49.2      | -52.4      | -73.6      | -62.0      |
| Young03        | -52.3      | -33.1      | -36.5      | -45.5      | -24.6      |
| Young04        | -41.1      | -53.9      | -53.3      | -45.6      | -36.1      |
| Young05        | -36.4      | -41.1      | -46.3      | -45.5      | -64.0      |
| Young06        | -32.1      | -35.6      | -48.3      | -49.5      | -47.0      |
| Young07        | -55.7      | -51.3      | -64.8      | -35.6      | -52.9      |
| Young08        | -41.6      | -56.3      | -58.8      | -57.5      | -35.9      |
| Young09        | -43.4      | -50.2      | -69.7      | -42.7      | -55.9      |
| Older01        | -35.0      | -48.5      | -58.5      | -40.5      | -47.9      |
| Older02        | -44.8      | -44.8      | -55.2      | -37.2      | -40.9      |
| Older03        | -40.2      | -44.2      | -43.7      | -31.8      | -30.8      |
| Older04        | -37.7      | -46.5      | -46.1      | -51.1      | -46.2      |
| Older05        | -52.8      | -51.0      | -64.5      | -39.9      | -68.0      |
| Older06        | -24.6      | -34.1      | -38.5      | -27.6      | -27.6      |
| Older07        | -19.4      | -32.4      | -25.9      | -37.4      | -40.4      |
| Older08        | -38.4      | -33.6      | -36.5      | -35.4      | -46.2      |
| Older09        | -34.9      | -50.5      | -38.5      | -41.1      | -36.2      |
